# Supplementary material
Source: PubMed Central journal article supplement (PMC5625495)
Supplement: JVI.00816-17_zjv999182954s1.pdf [file JVI.00816-17_zjv999182954s1.pdf]

**Table S1. Chikungunya virus 3'-UTR Elements.** Alignment of nucleotides 11,921-11,964 in strain AF15561, which is deleted in plaque isolates from the serum of persistently-infected *Rag1* *-/-* mice, with similar elements found in the 3'-UTRs of other CHIKV strains.

|           |               | Strain                                        | Accession Number                             |                                               | Percent ID |
|-----------|---------------|-----------------------------------------------|----------------------------------------------|-----------------------------------------------|------------|
| CHIKV     | Asian         | AF15561 (11,921-11,964)                       | EF452493                                     | aagcttcctaaaagcagccgaactcactttgagatgtaggcata  | 100        |
|           |               | AF15561 (11,728-11,768)                       | EF452493                                     | aagcttcctaaaagcagccgaactcactttgagatgtaggcgta  | 95.45      |
|           |               | MY021IMR/06/BP                                | EU703762                                     | aagcttcctaaaagcagccgaactcactttgagatgtaggcata  | 100        |
|           |               | MY002IMR/06/BP                                | EU703759                                     | aagcttcctaaaagcagccgaactcactttgagatgtaggcata  | 100        |
|           |               | MY003IMR/06/BP                                | EU703760                                     | aagcttcctaaaagcagccgaactcactttgagatgtaggcata  | 100        |
|           |               | MY019IMR/06/BP                                | EU703761                                     | aagcttcctaaaagcagccgaactcactttgagatgtaggcata  | 100        |
|           |               | 0706aTw                                       | FJ807897                                     | aagcttcctaaaagcagccgaactcactttgagatgtaggcata  | 97.73      |
|           |               | PhH15483                                      | HM045790                                     | aagcttcctaaaagcagccgaactcactttgagatgtaggcata  | 100        |
|           |               | Hu/85/NR/001                                  | HM045800                                     | aagcttcctaaaagcagccgaactcactttgagatgtaggcata  | 100        |
|           |               | JKT23574                                      | HM045791                                     | aagcttcctaaaagcagccgaactcactttgagatgtaggcata  | 100        |
|           |               | RSU1                                          | HM045797                                     | aagcttcctaaaagcagccgaactcactttgagatgtaggcata  | 100        |
|           |               | SV0444-95                                     | HM045787                                     | aagcttcctaaaagtagccgaactcactttgagacgttaggcata | 95.45      |
|           |               | CO392-95                                      | HM045796                                     | aagcttcctaaaagcagccgaactcactttgagatgtaggcgta  | 95.45      |
|           |               | 6441-88                                       | HM045789                                     | aagcttcctaaaagcagccgaactcactttgagatgtaggcgta  | 95.45      |
|           |               | 3412-78                                       | HM045808                                     | aagcttcctaaaagcagccgaactcactttgagatgtaggcata  | 100        |
|           |               | 1455-75                                       | HM045814                                     | aagcttcctaaaagcagccgaactcactttgagatgtaggcata  | 100        |
|           |               | TH35                                          | HM045810                                     | aagcttcctaaaagcagccgaactcactttgagatgtaggcata  | 100        |
|           |               | IND-73-MH5                                    | EF027141                                     | aagcttcctaaaagcagccgaactcactttgagatgtaggcata  | 93         |
|           |               | P0731460                                      | HM045788                                     | aagcttcctaaaagcagccgaactcactttgagatgtaggcata  | 100        |
|           |               | Gibbs 63-263                                  | HM045813                                     | aagcttcctaaaagcagccgaactcactttgagatgtaggcata  | 100        |
|           | IND-63-WB1    | EF027140                                      | aagcttcctaaaagcagccgaactcactttgagatgtaggcata | 97.73                                         |            |
|           | I-634029      | HM045803                                      | aagcttcctaaaagcagccgaactcactttgagatgtaggcata | 97.73                                         |            |
|           | IND-KR51      | FJ000066                                      | aagcttcctaaaagcagccgaactcactttgagaagtaggcata | 97.72                                         |            |
|           | 0611aTw       | FJ807896                                      | aagcttcctaaaagcagccgaactcactttgagaagtaggcata | 97.72                                         |            |
|           | INF-KA51      | FJ000068                                      | aagcttcctaaaagcagccgaactcactttgagaagtaggcata | 97.72                                         |            |
|           | SL10571       | AB455494                                      | aagcttcctaaaagcagccgaactcactttgagaagtaggcata | 97.72                                         |            |
|           | RGCB120/KL07  | GQ428213                                      | aagcttcctaaaagcagccgaactcactttgagaagtaggcata | 97.72                                         |            |
|           | 0810bTw       | FJ807899                                      | aagcttcctaaaagcagccgaactcactttgagaagtaggcata | 97.72                                         |            |
|           | RGCB80/KL07   | GQ428212                                      | aagcttcctaaaagcagccgaactcactttgagaagtaggcata | 97.72                                         |            |
|           | IND-06-RJ1    | EF027137                                      | aagcttcctaaaagcagccgaactcactttgagaagtaggcata | 97.72                                         |            |
|           | IND-06-KA15   | EF027135                                      | aagcttcctaaaagcagccgaactcactttgagaagtaggcata | 97.72                                         |            |
|           | IND-GJ51      | FJ000064                                      | aagcttcctaaaagcagccgaactcactttgagaagtaggcata | 97.72                                         |            |
|           | IND-06-AP3    | EF027134                                      | aagcttcctaaaagcagccgaactcactttgagaagtaggcata | 97.72                                         |            |
|           | RGCB356/KL08  | GQ428215                                      | aagcttcctaaaagcagccgaactcactttgagaagtaggcata | 97.72                                         |            |
|           | OPY4          | KP003809                                      | aagcttcctaaaagcagccgaactcactttgagaagtaggcata | 97.72                                         |            |
|           | TM25          | EU564334                                      | aagcttcctaaaagcagccgaactcactttgagaagtaggcata | 97.72                                         |            |
|           | SL15649       | GU189061                                      | aagcttcctaaaagcagccgaactcactttgagaagtaggcata | 97.72                                         |            |
|           | DakAr B 16878 | HM045784                                      | aagcttcctaaaagcagccgaactcactttgagatgtaggcata | 100                                           |            |
|           | UgAg4155      | HM045812                                      | aagcttcctaaaagcagccgaactcactttgagatgtaggcata | 100                                           |            |
|           | HB78          | HM045822                                      | aagcttcctaaaagcagccgaactcactttgagatgtaggcata | 100                                           |            |
|           | SAH2123       | HM045795                                      | aagcttcctaaaagcagccgaactcactttgagatgtaggcata | 100                                           |            |
|           | AR 18211      | HM045805                                      | aagcttcctaaaagcagccgaactcactttgagatgtaggcata | 100                                           |            |
|           | Ross low-psg  | HM045811                                      | aagcttcctaaaagcagccgaactcactttgagatgtaggcata | 100                                           |            |
| A301      | HM045821      | aagcttcctaaaagcagccgaactcactttgagatgtaggcata  | 100                                          |                                               |            |
| Vereening | HM045792      | aagcttcctaaaagcagccgaactcactttgagatgtaggcata  | 100                                          |                                               |            |
| LFSF      | HM045809      | aagcttcctaaaagcagccgaactcactttgagatgtaggcata  | 100                                          |                                               |            |
| ArA 2657  | HM045818      | aagcttcctaaaagcagccgaactcactttgagacgttaggcata | 97.72                                        |                                               |            |
| ArD 93229 | HM045819      | aagcttcctaaaagcagccgaactcactttgagacgttaggcata | 97.72                                        |                                               |            |
| ArA 30548 | HM045820      | aagcttcctaaaagcagccgaactcactttgagacgttaggcata | 97.72                                        |                                               |            |
| HD 180760 | HM045817      | aagcttcctaaaagcagccgaactcactttgagacgttaggcata | 97.72                                        |                                               |            |
| 37997     | AY726732      | aagcttcctaaaagcagccgaactcactttgagacgttaggcata | 97.72                                        |                                               |            |
| IbH35     | HM045786      | aagcttcctaaaagcagccgaactcactttgagacgttaggcata | 97.72                                        |                                               |            |
| IbAn4824  | HM045807      | aagcttcctaaaagcagccgaactcactttgagacgttaggcata | 97.72                                        |                                               |            |
| SH2830    | HM045798      | aagcttcctaaaagcagccgaactcactttgagacgttaggcata | 97.72                                        |                                               |            |
| PM2951    | HM045785      | aagcttcctaaaagcagccgaactcactttgagacgttaggcata | 97.72                                        |                                               |            |
| ArD 30237 | HM045815      | aagcttcctaaaagcagccgaactcactttgagacgttaggcata | 97.72                                        |                                               |            |
| Sh 3013   | HM045816      | aagcttcctaaaagcagccgaactcactttgagacgttaggcata | 97.72                                        |                                               |            |
|           |               |                                               |                                              |                                               |            |
